# Supplementary material
Source: PubMed Central journal article supplement (PMC8674373)
Supplement: NIHMS1699651-supplement-1.pdf [file NIHMS1699651-supplement-1.pdf]

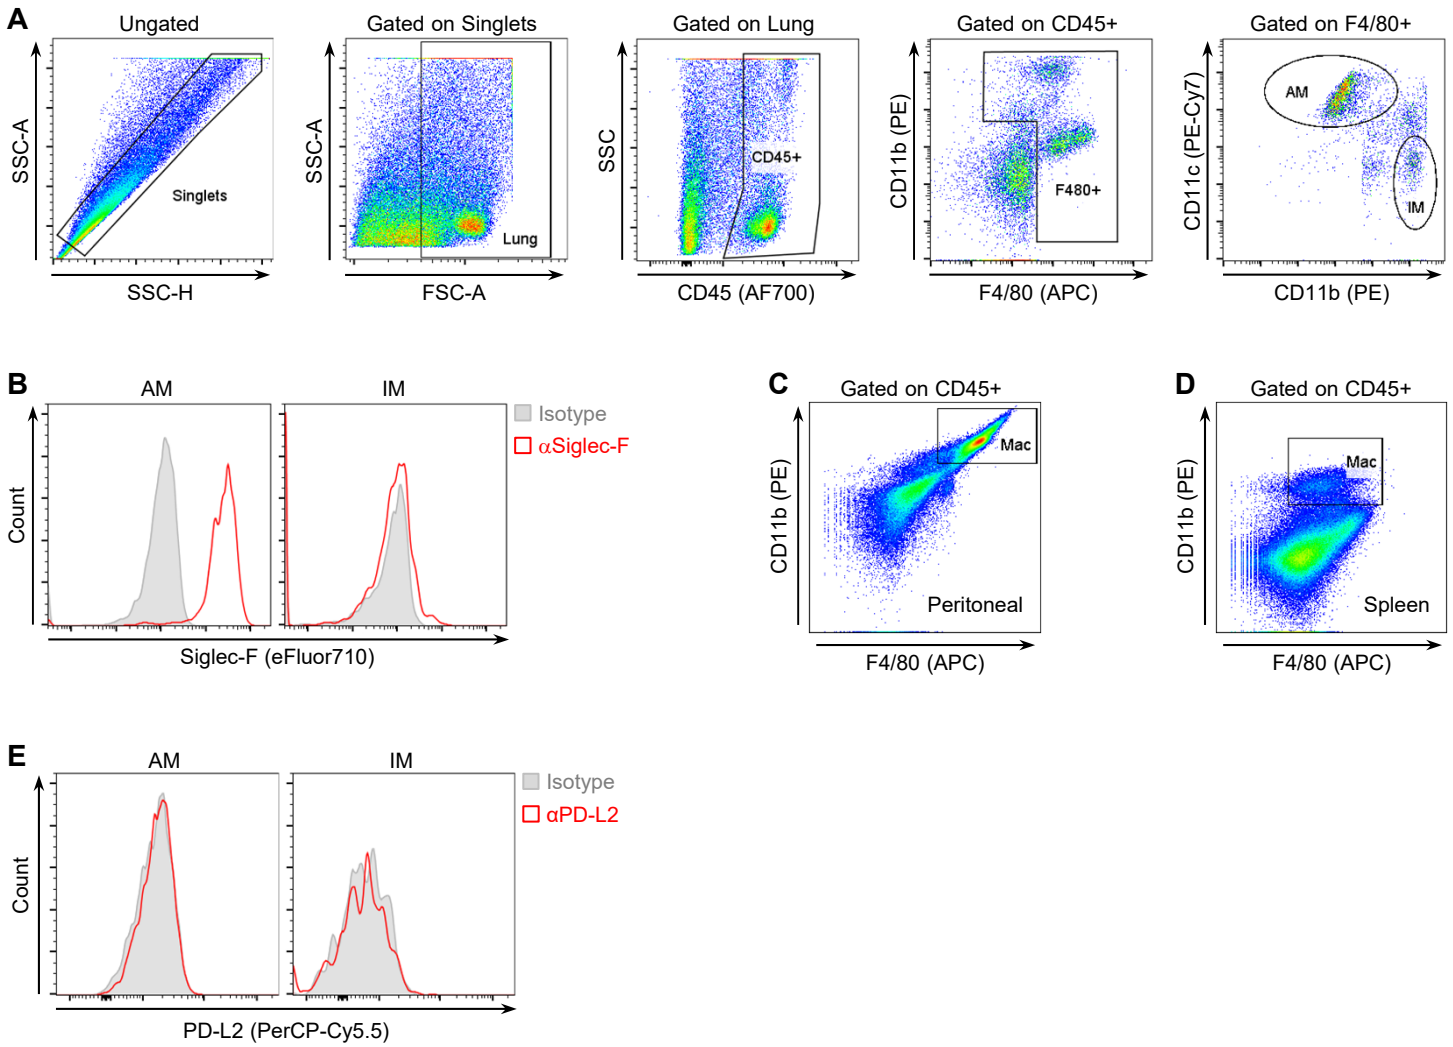

**Supplemental Figure 1.** FACS gating strategies for macrophages in different tissues of mice. **(A)** Gating strategy for lung macrophages: AM ( $CD11c^+CD11b^-$ ) and IM ( $CD11c^-CD11b^+$ ). **(B)** AM and IM verification by Siglec-F expression. **(C)** Gating strategy for peritoneal macrophage (Mac). **(D)** Gating strategy for splenic macrophage (Mac). **(E)** FACS assays showing neglectable expression of PD-L2 on AMs and IMs.

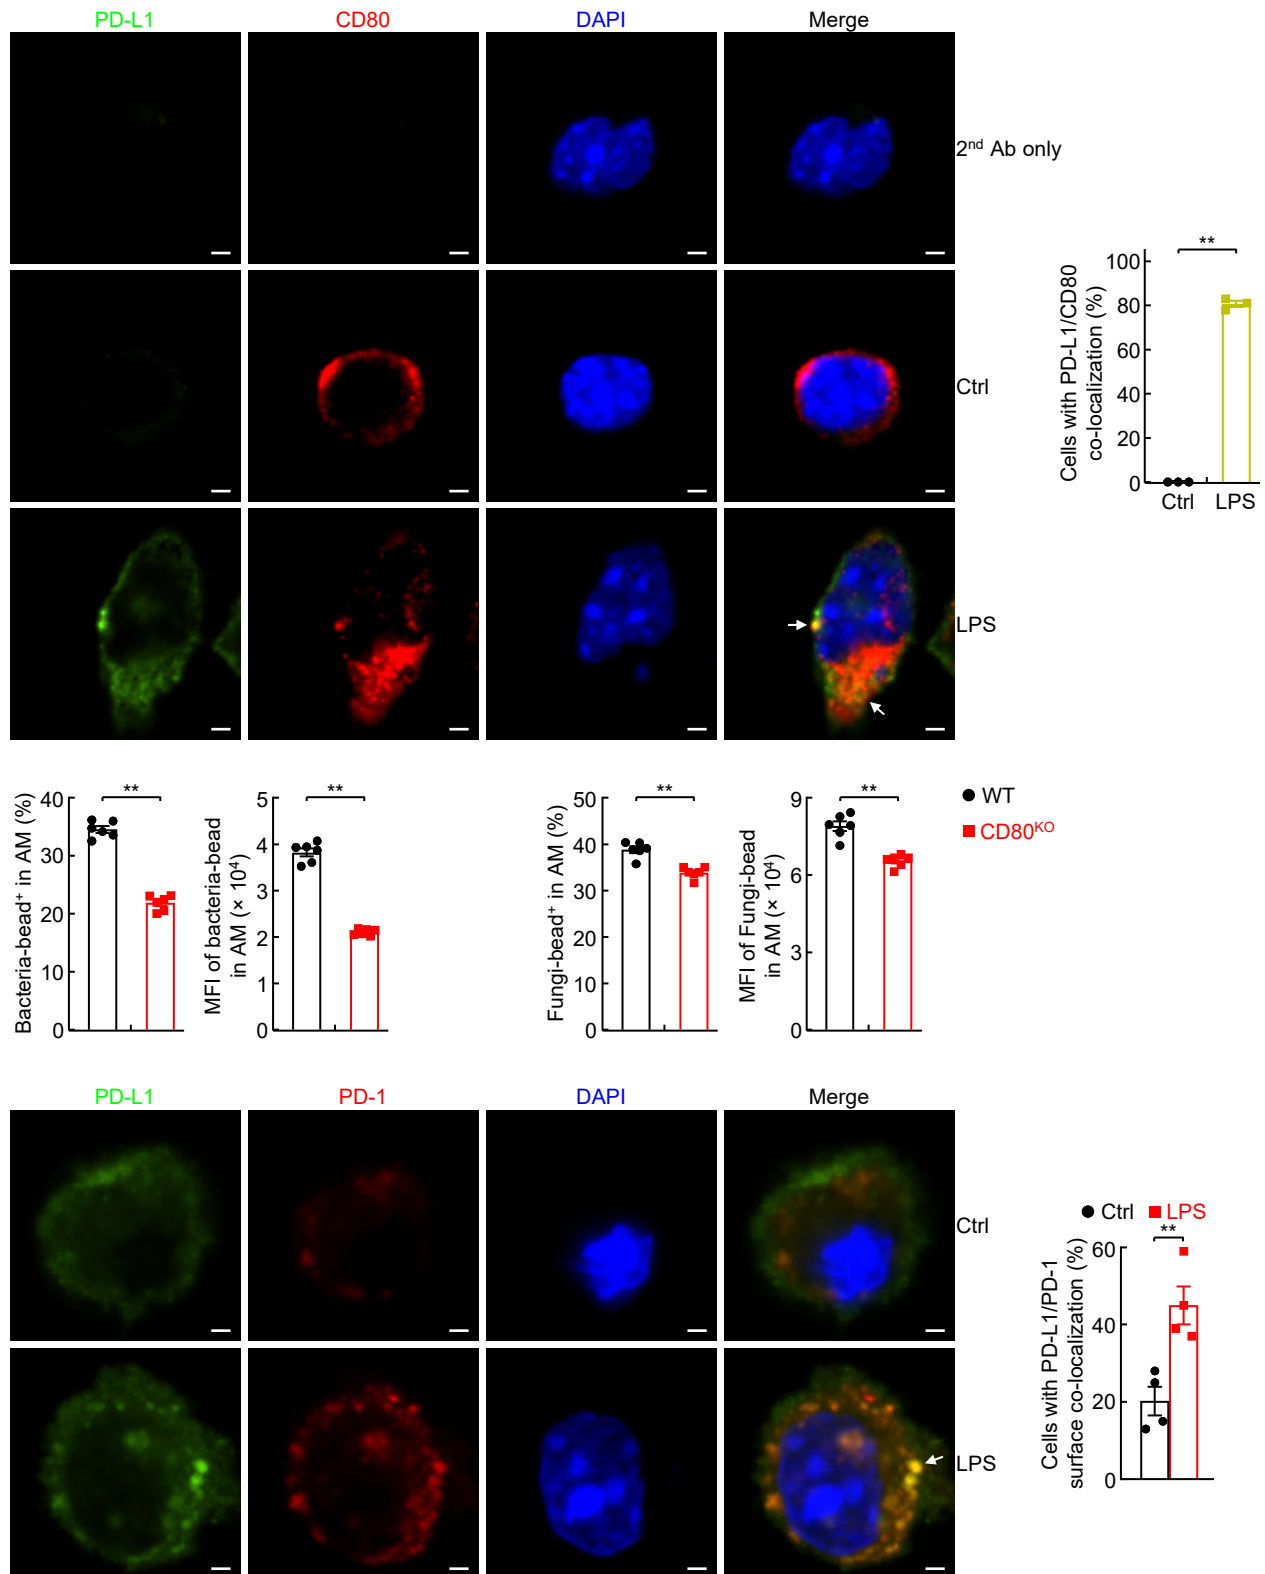

**Supplemental Figure 2.** PD-L1 interacts with CD80 in cis and this interaction boosts AM phagocytosis. **(A)** Confocal microscopy showing induction of PD-L1 expression in peritoneal macrophages by LPS and co-localization of PD-L1 and CD80 on their surface ( $n = 3$ ). Scale bar: 1  $\mu$ m. **(B)** Decreased ability of CD80<sup>KO</sup> AMs to phagocytose bacteria and fungi ( $n = 6$ ). Student's *t* test was performed (two tailed, unpaired) and data represent means  $\pm$  SEM. **\*\*** $P < 0.01$ . **(C)** Confocal microscopy showing increased *cis*-PD-L1/PD-1 interaction on AMs by LPS ( $n = 4$ ). Scale bar: 1  $\mu$ m. Student's *t* test was performed (two tailed, unpaired) and data represent means  $\pm$  SEM in (A-C). **\*\*** $P < 0.01$ .

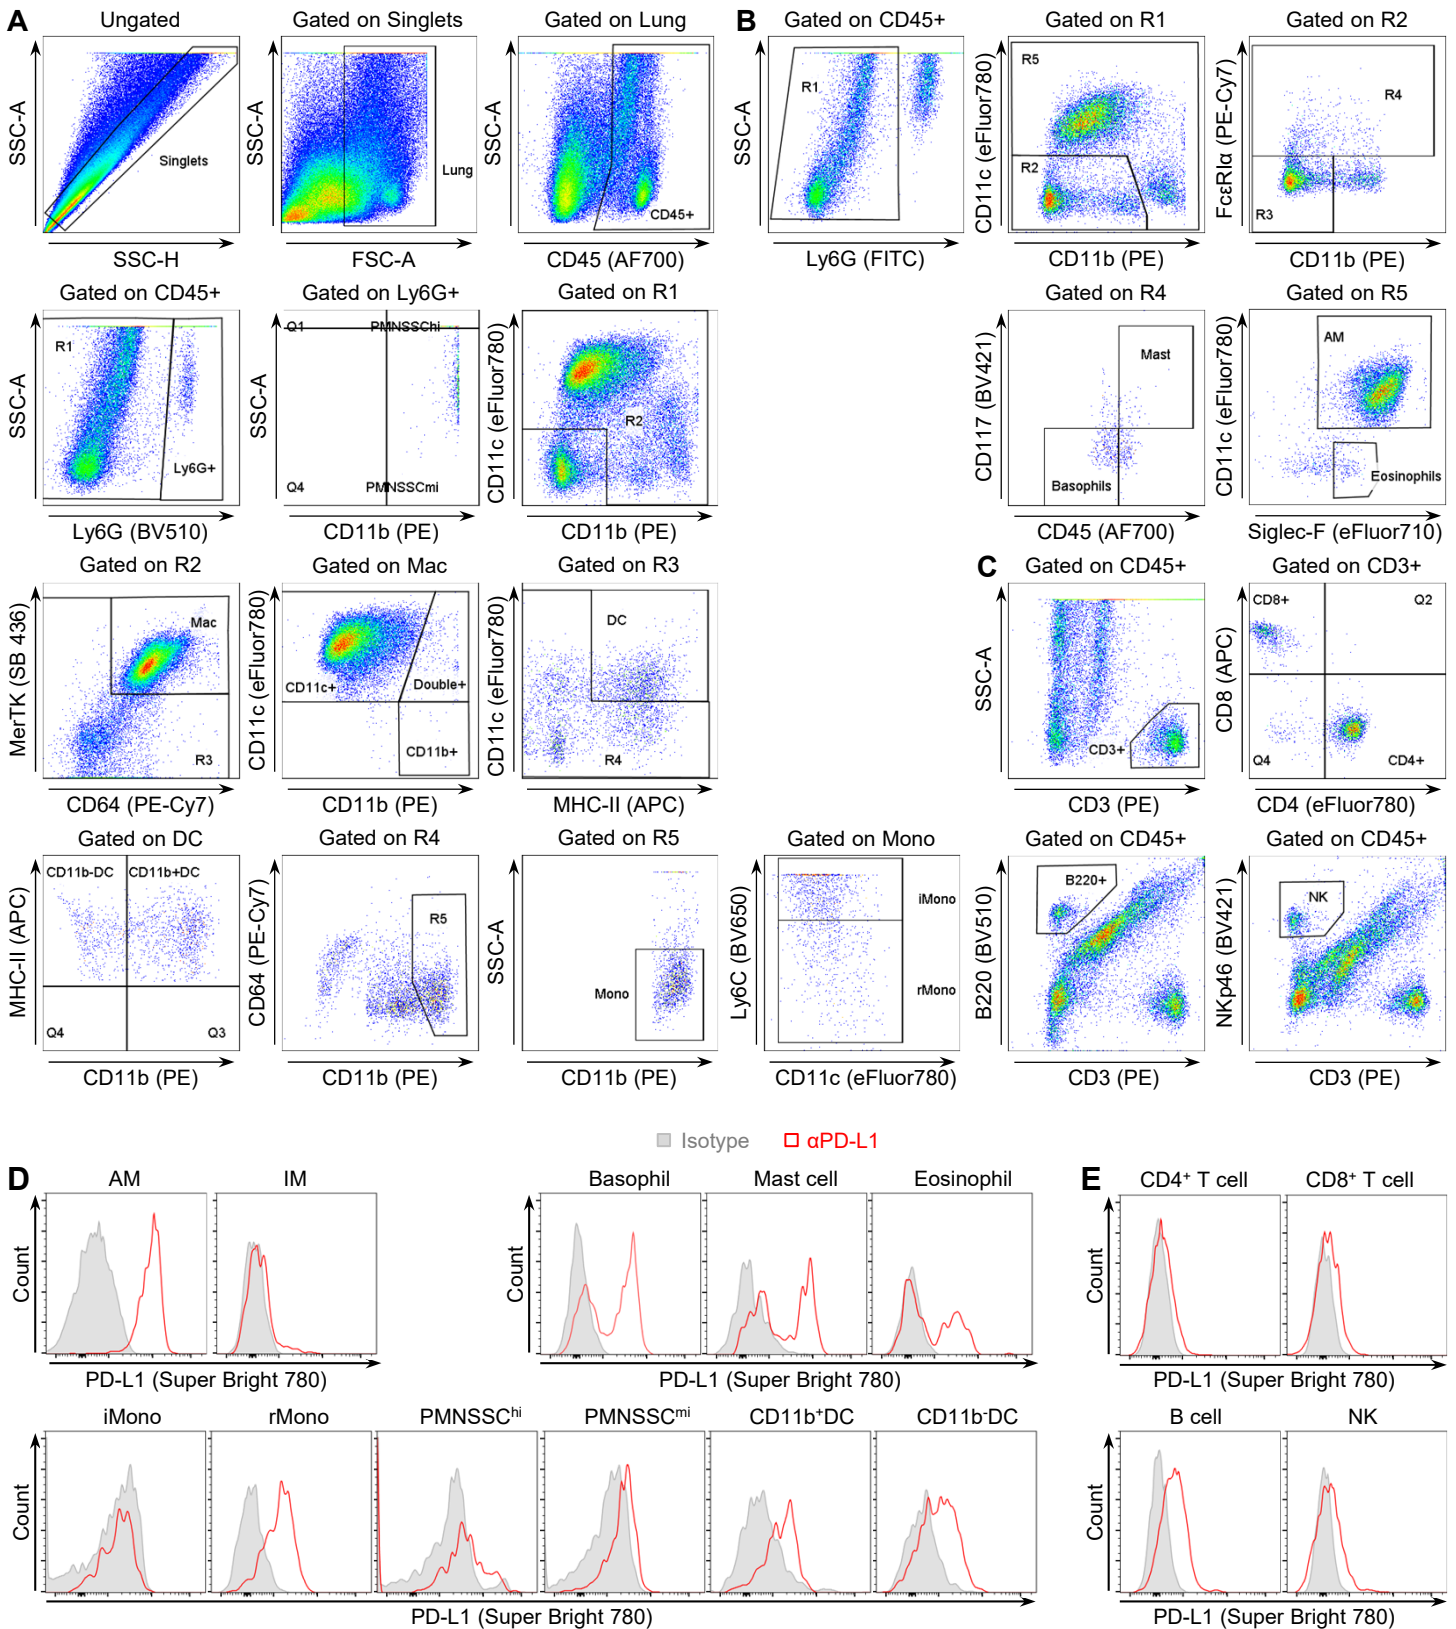

**Supplemental Figure 3.** Differential expression of PD-L1 on immune cells of FVB/N mice lung tissues. **(A-C)** FACS gating strategy for SSChi and SSCmi neutrophils (PMN), AM (CD11c<sup>+</sup>) and IM (CD11b<sup>+</sup>) macrophages (Mac), CD11b<sup>-</sup> and CD11b<sup>+</sup> dendritic cells (DC), iMono (Ly6C<sup>hi</sup> classical inflammatory) and rMono (Ly6C<sup>low</sup> non-classical resident) monocytes (Mono), basophils, mast cells (Mast), eosinophils, CD4<sup>+</sup> T cells (CD4<sup>+</sup>), CD8<sup>+</sup> T cells (CD8<sup>+</sup>), B cells (B220<sup>+</sup>) and natural killer (NK) cells. **(D, E)** FACS assays showing differential expression of PD-L1 on major myeloid cells (D) and different lymphocytes (E) in mouse lung ( $n = 5$ ). Representative histograms are shown.

**Supplemental Table 1. Antibodies Used**

| Antibody                                                        | Clone                          | Catalog number  | Company                                     | Usage               | Purpose   |
|-----------------------------------------------------------------|--------------------------------|-----------------|---------------------------------------------|---------------------|-----------|
| Anti-CD45 Alexa Fluor 700                                       | 30-F11, Rat IgG2b, κ           | 103128          | Biolegend, San Diego, CA, USA               | 0.5 µl per sample   | FACS      |
| Anti-CD80 BV510                                                 | 16-10A1, Armenian Hamster IgG  | 104741          | Biolegend, San Diego, CA, USA               | 2.5 µl per sample   | FACS      |
| Anti-PD-L2 PerCP/Cyanine5.5                                     | TY25, Rat IgG2a, κ             | 107218          | Biolegend, San Diego, CA, USA               | 1.25 µl per sample  | FACS      |
| Anti-CD117 BV421                                                | ACK2, Rat IgG2b, κ             | 135124          | Biolegend, San Diego, CA, USA               | 5.0 µl per sample   | FACS      |
| Anti-NKp46 BV421                                                | 29A1.4, Rat IgG2a, κ           | 137612          | Biolegend, San Diego, CA, USA               | 2.5 µl per sample   | FACS      |
| Anti-B220 BV510                                                 | RA3-6B2, Rat IgG2a, κ          | 103248          | Biolegend, San Diego, CA, USA               | 2.5 µl per sample   | FACS      |
| Anti-Ly6G BV510                                                 | 1A8, Rat IgG2a, κ              | 127633          | Biolegend, San Diego, CA, USA               | 2.5 µl per sample   | FACS      |
| Anti-Ly6C BV650                                                 | HK1.4, Rat IgG2c, κ            | 128049          | Biolegend, San Diego, CA, USA               | 1.25 µl per sample  | FACS      |
| Anti-CD64 PE-Cy7                                                | X54-5/7.1, Mouse IgG1, κ       | 139314          | Biolegend, San Diego, CA, USA               | 2.5 µl per sample   | FACS      |
| Anti-FcεR1α PE-Cy7                                              | MAR-1, Armenian Hamster IgG    | 134318          | Biolegend, San Diego, CA, USA               | 2.5 µl per sample   | FACS      |
| Anti-CD45 FITC                                                  | 30-F11, Rat IgG2b, κ           | 103107          | Biolegend, San Diego, CA, USA               | 0.5 µl per sample   | FACS      |
| Anti-MerTK Super Bright 436                                     | DS5MMER, Rat IgG2a, κ          | 62-5751-82      | Thermo Fisher Scientific, Waltham,MA, USA   | 5.0 µl per sample   | FACS      |
| Anti-PD-1 PerCP-eFluor710                                       | J43, Armenian hamster IgG      | 46-9985-82      | Thermo Fisher Scientific, Waltham,MA, USA   | 0.625 µl per sample | FACS      |
| Anti-MHC-II APC                                                 | M5/114.15.2, Rat IgG2b, κ      | 17-5321-82      | Thermo Fisher Scientific, Waltham,MA, USA   | 0.15 µl per sample  | FACS      |
| Anti-CD11c APC-eFluor780                                        | N418, Armenian hamster IgG     | 47-0114-82      | Thermo Fisher Scientific, Waltham,MA, USA   | 2.5 µl per sample   | FACS      |
| Anti-CD3e APC-eFluor780                                         | 145-2C11, Armenian hamster IgG | 47-0031-82      | Thermo Fisher Scientific, Waltham,MA, USA   | 5 µl per sample     | FACS      |
| Anti-CD4 APC-eFluor780                                          | RM4-5, Rat IgG2a, κ            | 47-0042-82      | Thermo Fisher Scientific, Waltham,MA, USA   | 0.625 µl per sample | FACS      |
| Anti-CD11b PE                                                   | M1/70, Rat IgG2b, κ            | 12-0112-82      | Thermo Fisher Scientific, Waltham,MA, USA   | 0.625 µl per sample | FACS      |
| Anti-CD11c PE-Cy7                                               | N418, Armenian hamster IgG     | 25-0114-82      | Thermo Fisher Scientific, Waltham,MA, USA   | 2.5 µl per sample   | FACS      |
| Anti-CD16/CD32                                                  | 93, Rat IgG2a, λ               | 14-0161-85      | Thermo Fisher Scientific, Waltham,MA, USA   | 1.0 µl per sample   | FACS      |
| Anti-CD3 PE                                                     | 145-2C11, Armenian hamster IgG | 12-0031-83      | Thermo Fisher Scientific, Waltham,MA, USA   | 2.5 µl per sample   | FACS      |
| Anti-CD4 PE-Cy7                                                 | RM4-5, Rat IgG2a, κ            | 25-0042-81      | Thermo Fisher Scientific, Waltham,MA, USA   | 1.25 µl per sample  | FACS      |
| Anti-CD8 APC                                                    | 53-6.7, Rat IgG2a, κ           | 17-0081-83      | Thermo Fisher Scientific, Waltham,MA, USA   | 0.625 µl per sample | FACS      |
| Anti-F4/80 APC                                                  | BM8, Rat IgG2a, κ              | 17-4801-82      | Thermo Fisher Scientific, Waltham,MA, USA   | 2.0 µl per sample   | FACS      |
| Anti-GranzB FITC                                                | NGZB, Rat IgG2a, κ             | 11-8898-80      | Thermo Fisher Scientific, Waltham,MA, USA   | 0.25 µl per sample  | FACS      |
| Anti-IFNγ FITC                                                  | XMG1.2, Rat IgG1, κ            | 11-7311-81      | Thermo Fisher Scientific, Waltham,MA, USA   | 1.0 µl per sample   | FACS      |
| Anti-PD-1 eFluor450                                             | J43, Armenian hamster IgG      | 48-9985-82      | Thermo Fisher Scientific, Waltham,MA, USA   | 2.5 µl per sample   | FACS      |
| Anti-PD-L1 PE-Cy7                                               | MIH5, Rat IgG2a, λ             | 25-5982-82      | Thermo Fisher Scientific, Waltham,MA, USA   | 0.625 µl per sample | FACS      |
| Anti-PD-L1 Super Bright 780                                     | MIH5, Rat IgG2a, λ             | 78-5982-82      | Thermo Fisher Scientific, Waltham,MA, USA   | 0.3 µl per sample   | FACS      |
| Anti-Siglec-F PerCP-eFluor710                                   | 1RNM44N, Rat IgG2a, κ          | 46-1702-82      | Thermo Fisher Scientific, Waltham,MA, USA   | 0.625 µl per sample | FACS      |
| Rat IgG2a kappa Isotype Control, PE-Cyanine7                    | eBR2a                          | 25-4321-82      | Thermo Fisher Scientific, Waltham,MA, USA   | 0.625 µl per sample | FACS      |
| Rat IgG2a kappa Isotype Control, Super Bright 780               | eBR2a                          | 78-4321-82      | Thermo Fisher Scientific, Waltham,MA, USA   | 0.3 µl per sample   | FACS      |
| Armenian Hamster IgG Isotype Control, PerCP-eFluor 710          | eBio299Arm                     | 46-4888-82      | Thermo Fisher Scientific, Waltham,MA, USA   | 0.625 µl per sample | FACS      |
| Armenian Hamster IgG Isotype Control, eFluor 450                | eBio299Arm                     | 48-4888-82      | Thermo Fisher Scientific, Waltham,MA, USA   | 2.5 µl per sample   | FACS      |
| Armenian Hamster IgG Isotype Control, BV510                     | HTK888                         | 400942          | Biolegend, San Diego, CA, USA               | 2.5 µl per sample   | FACS      |
| Rat IgG2a, κ Isotype Control, PerCP/Cyanine5.5                  | RTK2758                        | 400531          | Biolegend, San Diego, CA, USA               | 1.25 µl per sample  | FACS      |
| Latex Beads-Rabbit IgG-FITC Complex                             |                                | 500290          | Cayman Chemical, Ann Arbor, MI, USA         | 1:100               | FACS      |
| pHrodo Green <i>S. aureus</i> Bioparticles Conjugate            |                                | P35367          | Thermo Fisher Scientific, Waltham,MA, USA   | 1 mg/ml             | FACS      |
| Zymosan A ( <i>S. cerevisiae</i> ) BioParticles AF488 conjugate |                                | Z23373          | Thermo Fisher Scientific, Waltham,MA, USA   | 0.25 mg/ml          | FACS      |
| Anti-PD-1                                                       | 29F.1A12, Rat IgG2a, κ         | BE0273          | BioXcell, West Lebanon, NH, USA             | 20 µg/ml            | Bloackade |
| Anti-PD-L1                                                      | 10F.9G2, Rat IgG2b, κ          | BE0101          | BioXcell, West Lebanon, NH, USA             | 20 µg/ml            | Bloackade |
| Anti-CD80                                                       | Rabbit polyclonal              | ab254579        | Abcam, Cambridge, UK                        | 20 µg/ml            | IF        |
| Anti-PD-L1                                                      | 10F.9G2, Rat IgG2b, κ          | BE0101          | BioXcell, West Lebanon, NH, USA             | 20 µg/ml            | IF        |
| Anti-PD-1                                                       | D7D5W, Rabbit IgG              | 84651           | Cell Signaling Technology, Danvers, MA, USA | 1:100               | IF        |
| Donkey anti-Rat FITC                                            |                                | DKXRT-003-DFITC | ImmunoReagents Inc., Raleigh, NC, USA       | 1:200               | IF        |
| Donkey anti-Rabbit IgG-R                                        |                                | sc-2095         | Santa Cruz Biotechnology, Dallas, TX,USA    | 1:200               | IF        |
| Donkey anti-Rat AF488                                           |                                | A21208          | Thermo Fisher Scientific, Waltham,MA, USA   | 1:400               | IF        |
| Donkey anti-Rabbit AF568                                        |                                | A10042          | Thermo Fisher Scientific, Waltham,MA, USA   | 1:400               | IF        |
